# Supplementary material for: SCG2 is a Prognostic Biomarker Associated With Immune Infiltration and Macrophage Polarization in Colorectal Cancer
Source: Front Cell Dev Biol. 2022 Jan 3;9:795133. doi: 10.3389/fcell.2021.795133 (PMC8763391; doi:10.3389/fcell.2021.795133)
Supplement: Supplementary file 2 [file Table3.xlsx]

## Sheet: gsea_report_for_High_1604575210
NAME	SIZE	ES	NES	NOM p-val	FDR q-val	FWER p-val	RANK AT MAX	LEADING EDGE
HALLMARK_MYOGENESIS	198	0.640434	2.20979	0	0	0	3417	tags=46%, list=17%, signal=55%
HALLMARK_KRAS_SIGNALING_UP	193	0.572227	2.0994	0	0.00294358	0.003	4499	tags=45%, list=22%, signal=57%
HALLMARK_APICAL_JUNCTION	194	0.589922	2.09508	0	0.00269572	0.004	3826	tags=44%, list=19%, signal=54%
HALLMARK_COAGULATION	136	0.61041	2.09097	0	0.00202179	0.004	2621	tags=32%, list=13%, signal=37%
HALLMARK_EPITHELIAL_MESENCHYMAL_TRANSITION	194	0.759726	2.0533	0	0.00215337	0.006	3153	tags=70%, list=15%, signal=82%
HALLMARK_UV_RESPONSE_DN	137	0.633286	2.04541	0	0.00245263	0.008	4487	tags=57%, list=22%, signal=72%
HALLMARK_ANGIOGENESIS	36	0.703941	1.96523	0.00386847	0.00506474	0.022	2820	tags=50%, list=14%, signal=58%
HALLMARK_HEDGEHOG_SIGNALING	35	0.654838	1.93409	0	0.00827989	0.035	6052	tags=77%, list=29%, signal=109%
HALLMARK_COMPLEMENT	195	0.546421	1.87784	0.00590551	0.0124202	0.059	4023	tags=39%, list=20%, signal=49%
HALLMARK_IL2_STAT5_SIGNALING	194	0.493088	1.84387	0.00191571	0.0153359	0.084	4382	tags=44%, list=21%, signal=56%
HALLMARK_INFLAMMATORY_RESPONSE	197	0.580724	1.79793	0.00965251	0.0220451	0.124	4476	tags=48%, list=22%, signal=61%
HALLMARK_NOTCH_SIGNALING	32	0.518467	1.75067	0	0.0289876	0.162	1850	tags=28%, list=9%, signal=31%
HALLMARK_APICAL_SURFACE	43	0.534499	1.74477	0.00194553	0.0278721	0.168	5808	tags=51%, list=28%, signal=71%
HALLMARK_HYPOXIA	190	0.454993	1.68368	0.0180723	0.0448991	0.246	4812	tags=41%, list=23%, signal=52%
HALLMARK_KRAS_SIGNALING_DN	188	0.447949	1.64644	0	0.0555878	0.308	7442	tags=51%, list=36%, signal=79%
HALLMARK_WNT_BETA_CATENIN_SIGNALING	42	0.511687	1.62855	0.0197628	0.0579793	0.339	4976	tags=48%, list=24%, signal=63%
HALLMARK_IL6_JAK_STAT3_SIGNALING	87	0.536996	1.6264	0.0430528	0.0551119	0.341	5199	tags=51%, list=25%, signal=67%
HALLMARK_ALLOGRAFT_REJECTION	195	0.52736	1.6199	0.045098	0.0539908	0.352	4392	tags=48%, list=21%, signal=60%
HALLMARK_TGF_BETA_SIGNALING	54	0.524362	1.61703	0.0255403	0.0519355	0.354	4077	tags=44%, list=20%, signal=55%
HALLMARK_APOPTOSIS	158	0.421162	1.60835	0.0260521	0.0525506	0.37	5203	tags=42%, list=25%, signal=56%
